# Supplementary material for: Restrictive Expression of Acid-Sensing Ion Channel 5 (Asic5) in Unipolar Brush Cells of the Vestibulocerebellum
Source: PubMed Central journal article supplement (PMC3963869; doi:10.1371/journal.pone.0091326), 2014-03-24

Figure S2

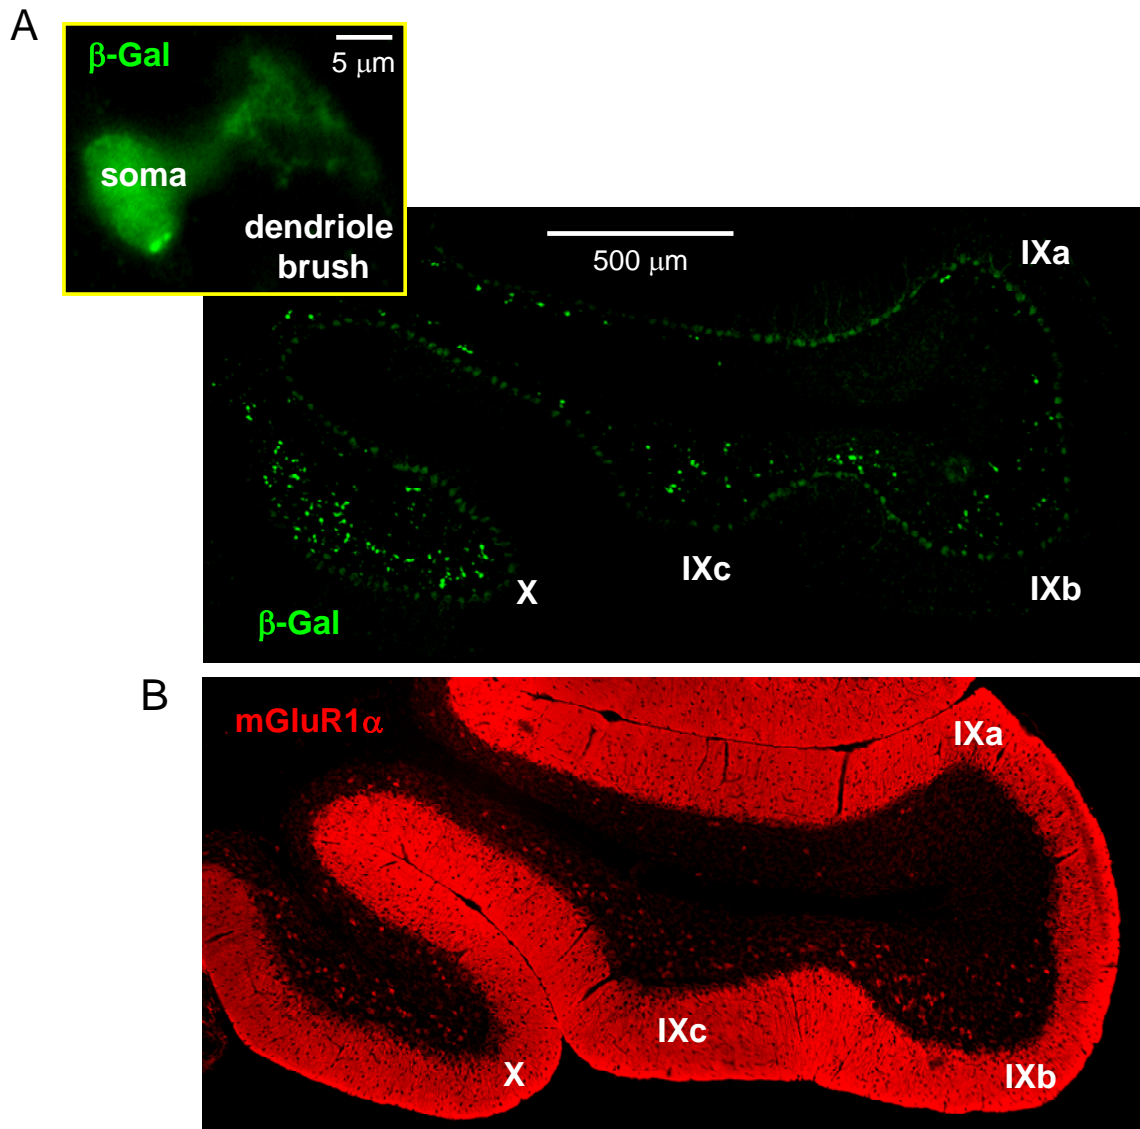

Supplement: pone.0091326.s002.pdf [file pone.0091326.s002.pdf]
